# Supplementary material for: Inhibition of Escherichia Virus MS2, Surrogate of SARS-CoV-2, via Essential Oils-Loaded Electrospun Fibrous Mats: Increasing the Multifunctionality of Antivirus Protection Masks
Source: MDPI journal article supplement (doi:10.3390/pharmaceutics14020303), 2022-01-27
Supplement: s1 [file s1]

# Supplementary Materials: Inhibition of *Escherichia* virus MS2, Surrogate of SARS-CoV-2, Via Essential Oils-Loaded Electrospun Fibrous Mats: Increasing the Multifunctionality of Antivirus Protection Masks

Joana M. Domingues, Marta O. Teixeira, Marta A. Teixeira, David Freitas, Samira F. da Silva, Shafagh D. Tohidi, Rui D. V. Fernandes, Jorge Padrão, Andrea Zille, Carla Silva, Joana C. Antunes and Helena P. Felgueiras

Evaluator N° \_\_\_\_\_ Age: \_\_\_\_\_ Gender: M/F Smell Problems: Y/N Smoker: Y/N

Were you ever infected with Covid-19: Y/N

Diagnosis Date: \_\_\_\_\_ Cure date: \_\_\_\_\_

This study intends to conduct an olfactory analysis of polymer mats with/without incorporated essential oils. To complete the questionnaire, please smell all samples (sequentially, each sample once) by holding the sample close to the nose (= 1 to 2 cm from the nose) for 30 sec. A 30 sec interval between samples should be respected, continuing the measurements after this interval. Then, please answer to questions 1-4.

Samples: A B C D E F G

## 1. Recognition of differences in intensity

Please complete the following table by placing the samples' code in the blank spaces, in ascending order of intensity.

Odor intensity

| Sample |  |  |  |  |  |  |  |
|--------|--|--|--|--|--|--|--|
|        |  |  |  |  |  |  |  |

Low

High

## 2. Intensity evaluation

Please establish an odor intensity correlation by writing the samples' code on the right column of the table, as you see fit.

| Odor intensity                | Sample(s) |
|-------------------------------|-----------|
| 0 = not perceptible           |           |
| 1 = weakly/not perceptible    |           |
| 2 = moderately perceptible    |           |
| 3 = clearly perceptible       |           |
| 4 = strongly perceptible      |           |
| 5 = very strongly perceptible |           |

## 3. Intensity between two samples

Please select (by placing an X in the corresponding blank space) the sample with the highest intensity in each pair.

Odor intensity

| Sample B | Sample C | Sample D | Sample E | Sample F | Sample G |
|----------|----------|----------|----------|----------|----------|
|          |          |          |          |          |          |

## 4. Affective evaluation

Please establish an affective evaluation correlation by writing the samples' code on the right column of the table, as you see fit.

| Affective evaluation             | Sample(s) |
|----------------------------------|-----------|
| -4 = extremely unpleasant        |           |
| -2 = unpleasant                  |           |
| 0 = not unpleasant, not pleasant |           |
| +2 = pleasant                    |           |
| +4 = extremely pleasant          |           |

Figure S1. Sensory evaluation questionnaire.

**Table S1.** Solid-phase microextraction followed by gas chromatography-mass spectrometry method (SPME-GC-MS) peak identification and quantification in LGO (examined at concentration of 1 mg/mL).

| Entry | Retention Time (min) | Compound identification                                                                   | Peak intensity (Area) | Relative Percentage (%) |
|-------|----------------------|-------------------------------------------------------------------------------------------|-----------------------|-------------------------|
| 1     | 9.061                | Unidentified                                                                              | 1.05E+07              | 0.98                    |
| 2     | 9.406                | $\alpha$ -pinene or 3-carene                                                              | 1.53E+07              | 1.43                    |
| 3     | 9.882                | Camphene                                                                                  | 8.95E+07              | 8.41                    |
| 4     | 10.905               | 6-methyl-5-Hepten-2-one                                                                   | 2.30E+07              | 2.16                    |
| 5     | 12.105               | Limonene                                                                                  | 2.04E+07              | 1.92                    |
| 6     | 12.286               | trans- $\beta$ -Ocimene                                                                   | 1.02E+07              | 0.95                    |
| 7     | 12.558               | Unidentified                                                                              | 8.65E+06              | 0.81                    |
| 8     | 13.156               | 4-Nonanone                                                                                | 1.47E+06              | 0.14                    |
| 9     | 14.753               | Decamethylcyclopentasiloxane (Siloxanes)                                                  | 3.23E+07              | **                      |
| 10    | 16.948               | <b>Citral</b>                                                                             | 3.06E+08              | <b>28.77</b>            |
| 11    | 17.202               | Geraniol                                                                                  | 2.23E+07              | 2.09                    |
| 12    | 17.556               | <b>Citral</b>                                                                             | 3.62E+08              | <b>33.94</b>            |
| 13    | 18.291               | Dodecamethylcyclohexasiloxane                                                             | 7.50E+07              | **                      |
| 14    | 19.707               | Geranyl acetate                                                                           | 6.59E+07              | 6.18                    |
| 15    | 20.633               | Caryophyllene                                                                             | 8.18E+07              | 7.68                    |
| 16    | 20.783               | 10,10-Dimethyl-2,6-dimethylenebicyclo[7.2.0]undecane                                      | 1.07E+07              | 1.00                    |
| 17    | 21.288               | Umulene                                                                                   | 8.61E+06              | 0.81                    |
| 18    | 21.416               | Tetradecamethylcycloheptasiloxane                                                         | 3.21E+07              | 3.01                    |
| 19    | 22.291               | 1-Isopropyl-7-methyl-4-methylene-1,2,3,4,4a,5,6,8a-octahydronaphthalene                   | 5.56E+07              | 5.22                    |
| 20    | 22.366               | [1S,cis]-Naphthalene,1,2,3,5,6,8a-hexahydro-4,7-dimethyl-1-[1-methylethyl]                | 8.52E+06              | 0.80                    |
| 21    | 23.504               | Caryophyllene oxide                                                                       | 1.65E+07              | 1.55                    |
| 22    | 24.189               | Hexadecamethylcyclooctasiloxane                                                           | 1.15E+07              | **                      |
| 23    | 31.989               | 3,4'-Isopropylidenediphenol or 4,4'-Isopropylidenediphenol or 2,4'-Isopropylidenediphenol | 2.89E+07              | 2.71                    |

\*\* Siloxanes release from the sampler and GC column.

**Table S2.** SPME-GC-MS peak identification and quantification in NO (examined at concentration of 1 mg/mL).

| Entry | Retention Time (min) | Compound identification                                                                                                                                                                                    | Peak intensity (Area) | Relative Percentage (%) |
|-------|----------------------|------------------------------------------------------------------------------------------------------------------------------------------------------------------------------------------------------------|-----------------------|-------------------------|
| 1     | 5.027                | Unidentified                                                                                                                                                                                               | 5.42E+05              | 0.01                    |
| 2     | 9.195                | $\alpha$ -Pinene or $\alpha$ -Phellandrene                                                                                                                                                                 | 1.29E+07              | 0.26                    |
| 3     | 9.401                | $\alpha$ -Pinene                                                                                                                                                                                           | 9.62E+08              | 19.12                   |
| 4     | 10.675               | $\beta$ -Pinene                                                                                                                                                                                            | 1.39E+08              | 2.76                    |
| 5     | 11.042               | $\beta$ -Mircene                                                                                                                                                                                           | 3.61E+07              | 0.72                    |
| 6     | 11.774               | 4-Terpinenyl acetate                                                                                                                                                                                       | 5.54E+06              | 0.11                    |
| 7     | 11.965               | <i>o</i> -Cymene or <i>m</i> -Cymene or <i>p</i> -Cymene                                                                                                                                                   | 1.07E+08              | 2.13                    |
| 8     | 12.096               | Limonene                                                                                                                                                                                                   | 5.56E+08              | 11.05                   |
| 9     | 12.103               | <b>1,8-Cineole or Eucalyptol</b>                                                                                                                                                                           | 2.24E+09              | <b>44.60</b>            |
| 10    | 12.848               | 4-carene or 3-carene                                                                                                                                                                                       | 3.27E+07              | 0.65                    |
| 11    | 13.531               | 4-methyl-3-(1-methylethylidene)-g-clohexene                                                                                                                                                                | 2.14E+07              | 0.43                    |
| 12    | 14.748               | Decamethylcyclopentasiloxane                                                                                                                                                                               | 2.02E+07              | **                      |
| 13    | 16.051               | $\alpha$ -Terpineol                                                                                                                                                                                        | 6.36E+07              | 1.26                    |
| 14    | 18.290               | Dodecamethylcyclohexasiloxane                                                                                                                                                                              | 3.01E+07              | **                      |
| 15    | 19.155               | $\alpha$ -Terpinyl formate                                                                                                                                                                                 | 2.12E+07              | 0.42                    |
| 16    | 20.637               | Caryophyllene                                                                                                                                                                                              | 5.45E+07              | 1.08                    |
| 17    | 20.785               | Unidentified                                                                                                                                                                                               | 9.38E+06              | 0.19                    |
| 18    | 21.377               | Unidentified                                                                                                                                                                                               | 2.40E+07              | 0.48                    |
| 19    | 21.417               | Tetradecamethylcycloheptasiloxane                                                                                                                                                                          | 1.39E+07              | **                      |
| 20    | 21.924               | Unidentified                                                                                                                                                                                               | 5.18E+07              | 1.03                    |
| 21    | 23.026               | Nerolidol                                                                                                                                                                                                  | 1.50E+08              | 2.98                    |
| 22    | 23.310               | Unidentified                                                                                                                                                                                               | 1.29E+07              | 0.26                    |
| 23    | 23.504               | Unidentified                                                                                                                                                                                               | 3.04E+07              | 0.60                    |
| 24    | 23.714               | [1 <i>aR</i> -(1 <i>a</i> $\alpha$ ,4 <i><math>\beta</math></i> ,4 <i>a</i> $\beta$ ,7 <i>a</i> $\beta$ ,7 <i>b</i> $\alpha$ )]-decahydro-1,1,4,7-tetramethyl-1 <i>H</i> -cycloprop[ <i>e</i> ]azulen-4-ol | 4.30E+08              | 8.54                    |
| 25    | 23.889               | Globulol                                                                                                                                                                                                   | 6.77E+07              | 1.35                    |
| 26    | 24.186               | Hexadecamethylcyclooctasiloxane                                                                                                                                                                            | 1.58E+07              | **                      |

\*\* Siloxanes release from the sampler and GC column.

**Table S3.** SPME-GC-MS peak identification and quantification in ELO (examined at concentration of 1 mg/mL).

| Entry | Retention Time (min) | Compound identification                                                                   | Peak intensity (Area) | Relative Percentage (%) |
|-------|----------------------|-------------------------------------------------------------------------------------------|-----------------------|-------------------------|
| 1     | 8.483                | Unidentified                                                                              | 1.02E+06              | 0.03                    |
| 2     | 9.402                | $\alpha$ -pinene                                                                          | 1.21E+09              | 31.51                   |
| 3     | 10.681               | $\beta$ -pinene                                                                           | 2.12E+07              | 0.55                    |
| 4     | 11.480               | $\alpha$ -Phellandrene                                                                    | 1.23E+07              | 0.32                    |
| 5     | 11.969               | o-Cymene or m-Cymene or p-Cymene                                                          | 8.67E+07              | 2.25                    |
| 6     | 12.101               | Limonene                                                                                  | 2.18E+08              | 5.66                    |
| 7     | 12.169               | <b>1,8-Cineole or Eucalyptol</b>                                                          | 2.06E+09              | <b>53.52</b>            |
| 8     | 12.845               | $\alpha$ -Phellandrene or $\gamma$ -Terpinene                                             | 5.11E+06              | 0.13                    |
| 9     | 14.751               | Decamethylcyclopentasiloxane                                                              | 1.72E+07              | **                      |
| 10    | 14.841               | Unidentified                                                                              | 1.59E+06              | 0.04                    |
| 11    | 15.328               | Pinocarvone                                                                               | 6.97E+06              | 0.18                    |
| 12    | 18.292               | Dodecamethylcyclohexasiloxane                                                             | 3.66E+07              | **                      |
| 13    | 19.160               | $\alpha$ -Terpineol                                                                       | 1.67E+07              | 0.43                    |
| 14    | 20.984               | Aromandendrene                                                                            | 8.62E+07              | 2.24                    |
| 15    | 21.378               | Aromandendrene                                                                            | 1.60E+07              | 0.41                    |
| 16    | 21.409               | Tetradecamethylcycloheptasiloxane                                                         | 1.10E+07              | 0.28                    |
| 17    | 23.156               | (-)-Globulol                                                                              | 1.02E+07              | 0.26                    |
| 18    | 23.564               | (-)-Globulol                                                                              | 4.09E+07              | 1.06                    |
| 19    | 24.187               | Hexadecamethylcyclooctasiloxane                                                           | 1.98E+07              | **                      |
| 20    | 31.960               | 3,4'-Isopropylidenediphenol or 4,4'-Isopropylidenediphenol or 2,4'-Isopropylidenediphenol | 5.36E+07              | 1.39                    |

\*\* Siloxanes release from the sampler and GC column.

**Table S4.** ATR-FTIR peaks' height and area ( $n = 3$ , S.D. < 3%).

|                            | Peaks                          | PCL    | PCLaLGO | PCLaNO | PCLaELO | PCLbLGO | PCLbNO | PCLbELO |
|----------------------------|--------------------------------|--------|---------|--------|---------|---------|--------|---------|
| CH <sub>2</sub> symmetric  | Wavenumber (cm <sup>-1</sup> ) | 2944   | 2944    | 2945   | 2946    | 2945    | 2945   | 2944    |
|                            | Height (Abs)                   | 0.042  | 0.060   | 0.076  | 0.080   | 0.084   | 0.066  | 0.074   |
|                            | Area                           | 1.690  | 2.463   | 3.132  | 3.296   | 4.190   | 2.743  | 3.093   |
| CH <sub>2</sub> asymmetric | Wavenumber (cm <sup>-1</sup> ) | 2863   | 2865    | 2865   | 2865    | 2865    | 2865   | 2864    |
|                            | Height (Abs)                   | 0.021  | 0.032   | 0.039  | 0.042   | 0.037   | 0.034  | 0.038   |
|                            | Area                           | 0.426  | 0.621   | 0.756  | 0.793   | 0.726   | 0.673  | 0.710   |
| C=O                        | Wavenumber (cm <sup>-1</sup> ) | 1721   | 1721    | 1721   | 1721    | 1721    | 1721   | 1721    |
|                            | Height (Abs)                   | 0.360  | 0.554   | 0.705  | 0.748   | 0.685   | 0.612  | 0.683   |
|                            | Area                           | 10.063 | 13.083  | 15.911 | 16.694  | 15.849  | 14.113 | 15.738  |
| C–O, C–C crystalline       | Wavenumber (cm <sup>-1</sup> ) | 1293   | 1294    | 1294   | 1294    | 1294    | 1294   | 1294    |
|                            | Height (Abs)                   | 0.058  | 0.086   | 0.099  | 0.104   | 0.091   | 0.083  | 0.092   |
|                            | Area                           | 0.765  | 1.117   | 1.308  | 1.395   | 1.190   | 1.101  | 1.216   |
| C–O, C–C amorphous         | Wavenumber (cm <sup>-1</sup> ) | 1162   | 1162    | 1161   | 1161    | 1161    | 1161   | 1161    |
|                            | Height (Abs)                   | 0.195  | 0.264   | 0.296  | 0.320   | 0.283   | 0.275  | 0.285   |
|                            | Area                           | 8.766  | 11.960  | 13.546 | 14.417  | 12.833  | 12.311 | 12.913  |
| C–O–C asymmetric           | Wavenumber (cm <sup>-1</sup> ) | 1239   | 1239    | 1239   | 1239    | 1240    | 1239   | 1239    |
|                            | Height (Abs)                   | 0.107  | 0.145   | 0.160  | 0.170   | 0.150   | 0.141  | 0.150   |
|                            | Area                           | 1.810  | 2.491   | 2.798  | 2.931   | 2.640   | 2.446  | 2.655   |

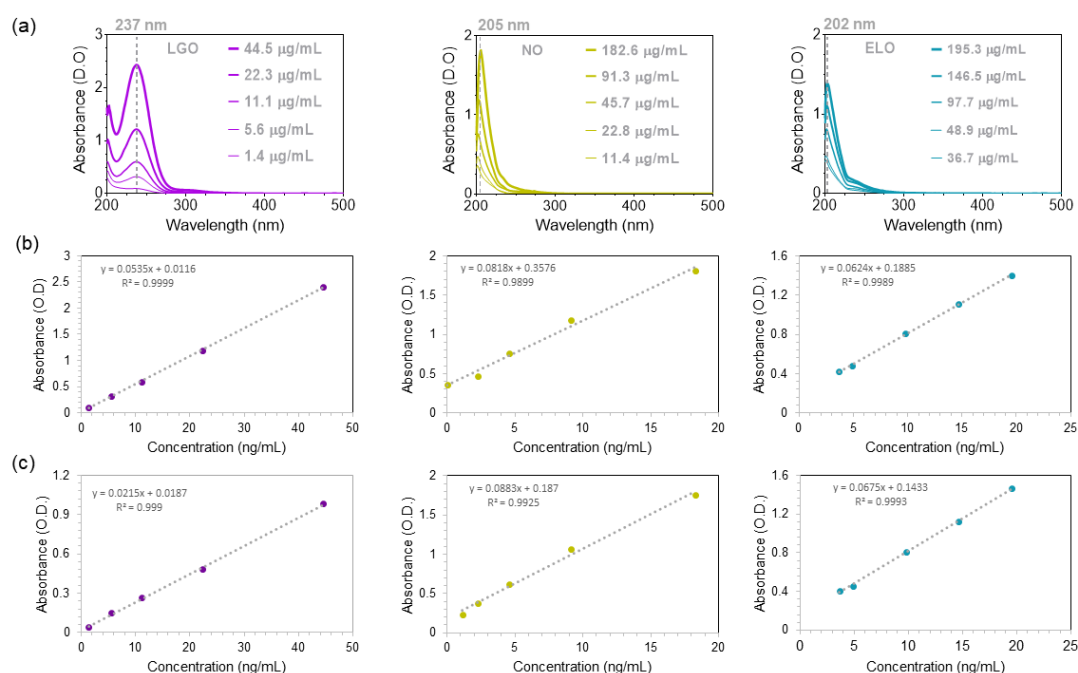

**Figure S2.** (a) Characteristic curves of LGO, NO and ELO at increasing EO concentration, determined using UV-visible spectroscopy. Calibration curves of LGO, NO and ELO extracted using (b) the UV-1800 and (c) the UV-2600.

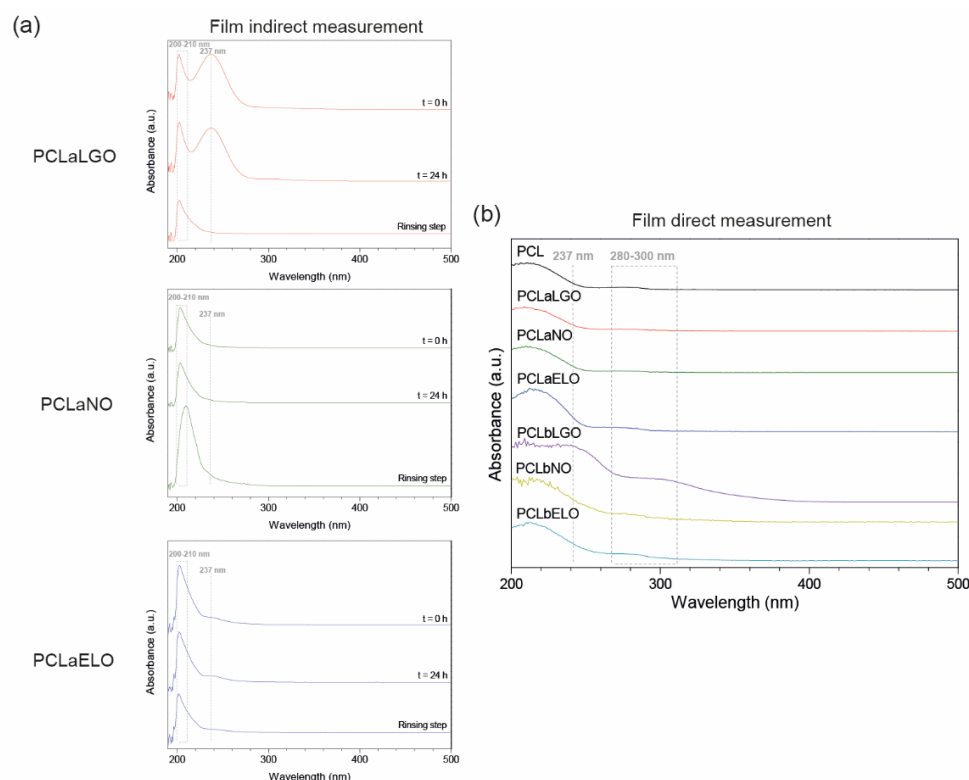

**Figure S3.** UV-visible absorption curves of representative (a) liquids used in the preparation of PCLaEOs mats, namely EO solution at  $t = 0$  h of incubation with the PCL films, the same solution following 24 h of contact with the immersed films, and ethanolic rinsing solution after the incubation period. For each EO, an ideal dilution factor was considered for the solutions collected at  $t = 0$  h and  $t = 24$  h, namely of 1600 $\times$  for LGO, 400 for NO and 600 $\times$  for ELO. Rinsing solutions were all ran at a dilution of 10 $\times$ . The 200–210 nm region comprehends characteristics peaks of NO and ELO. Wavelength of 237 nm is characteristic of citral (main LGO component). (b) Unloaded and loaded

PCL electrospun mats in the solid state. Shifts in the 280–300 nm region represent phenolic molecule rearrangements within the mats.

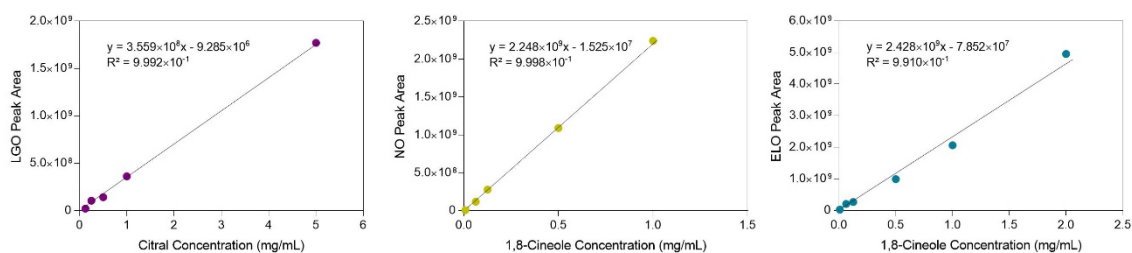

**Figure S4.** LGO, NO and ELO GC-MS calibration curves of the major components of each oil, namely citral and 1,8-cineole, tested for 4 h at 35 °C.

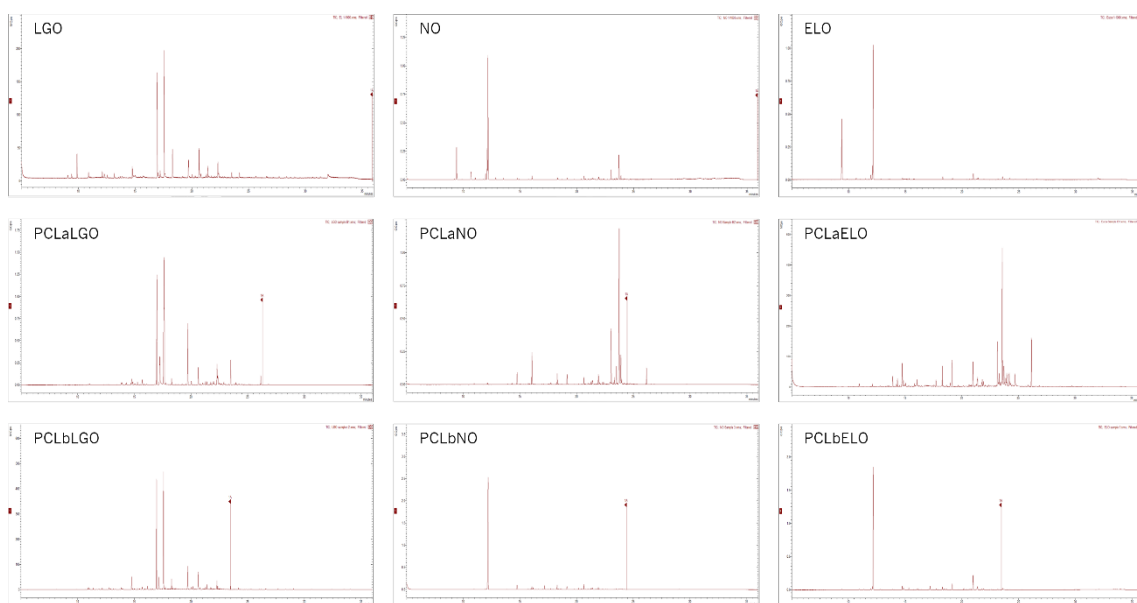

**Figure S5.** GC-MS spectra of the free EOs, LGO, NO and ELO prepared at 1 mg/mL concentration in ethanol, and the PCL mats absorbed and blended with the oils, PCLaEOs and PCLbEOs respectively.

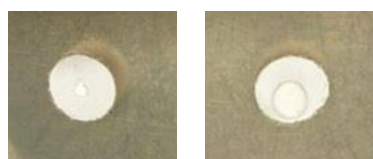

**Figure S6.** Photograph of a mat (exemplified with PCLbLGO) seeded with a bacteriophage droplet of (left) 5 µL and (right) 50 µL, for substrate and drop relative sizes comparison purposes. The first was used for permeability examinations (4 and 24 h at 37 °C), while the second was employed for contact inactivation studies (4 h at RT). After 4 h testing, the 5 µL droplet still remained on top of the surfaces.
